# Supplementary material for: miRNA Mediated Noise Making of 3′UTR Mutations in Cancer
Source: MDPI journal article supplement (doi:10.3390/genes9110545), 2018-11-12

Visual Legend for default

Node Fill Color Mapping

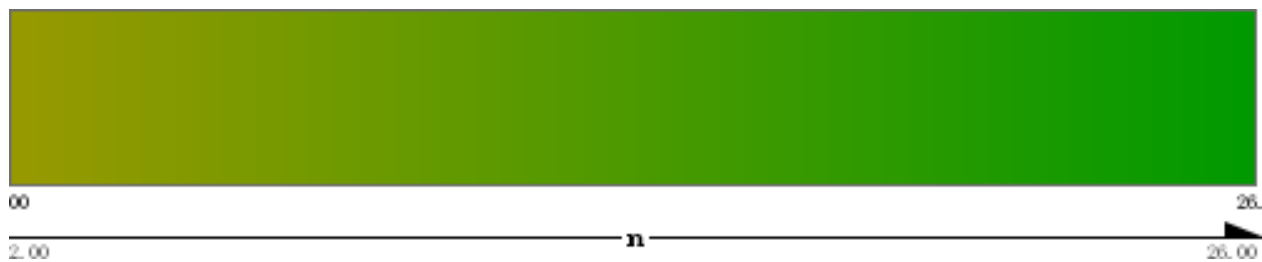

Edge Stroke Color (Unselected) Mapping

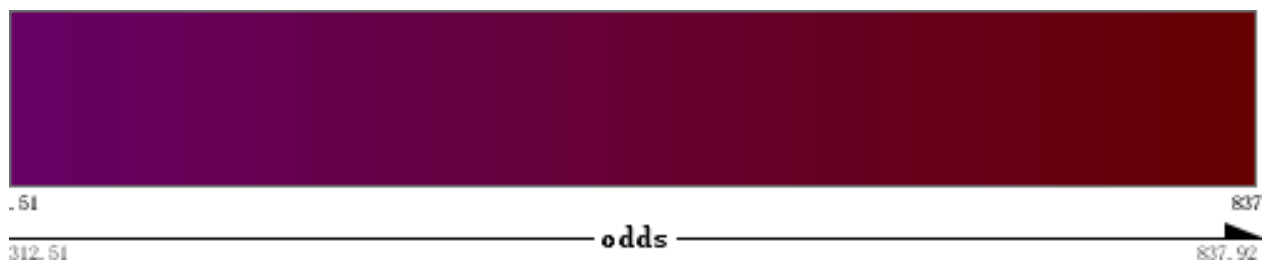

Module 1

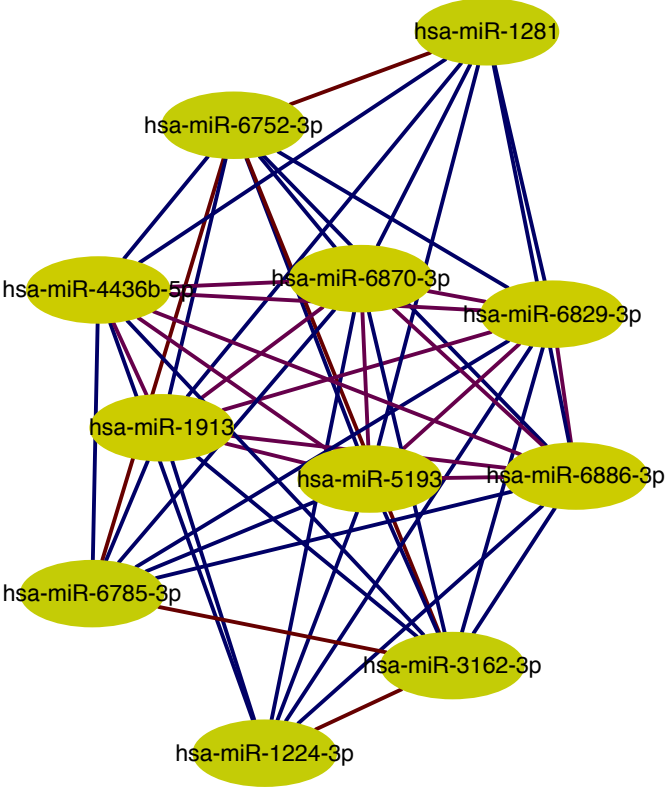

Module 2

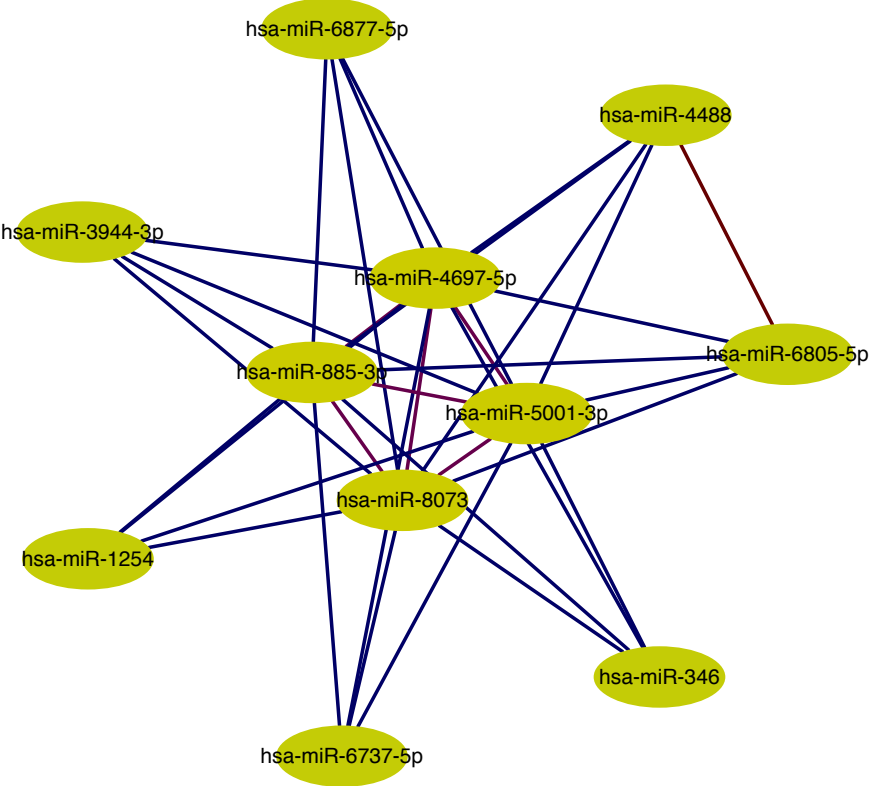

Module 3

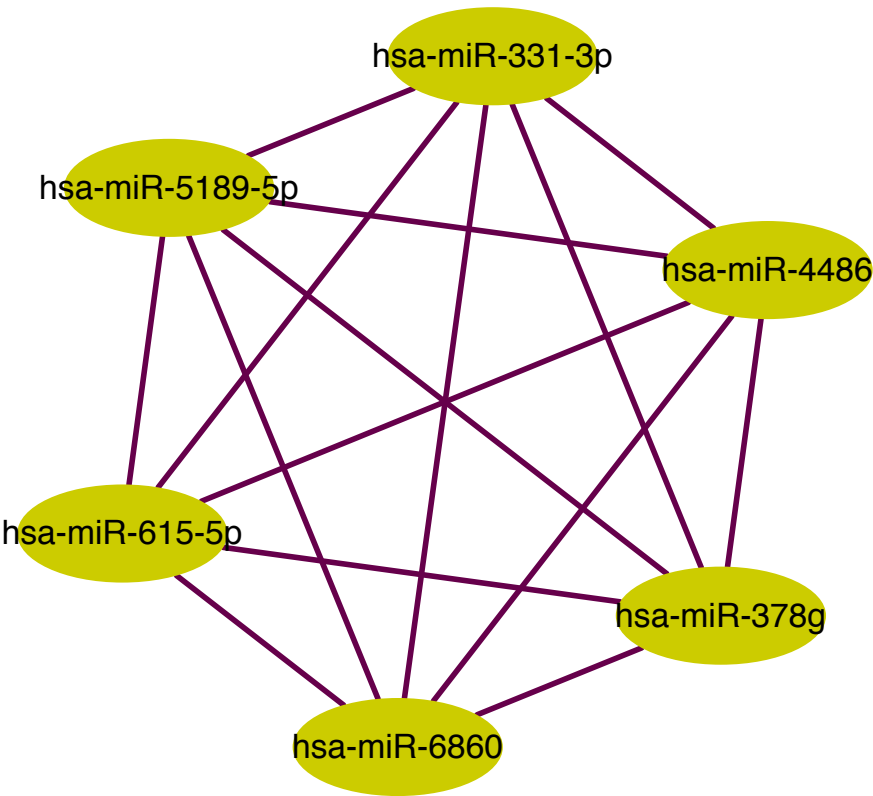

Module 4

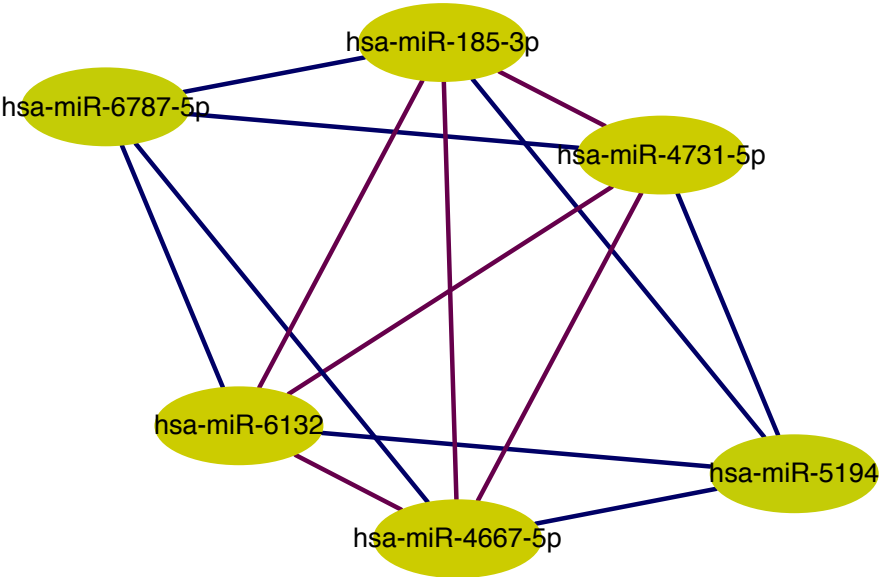

Module 5

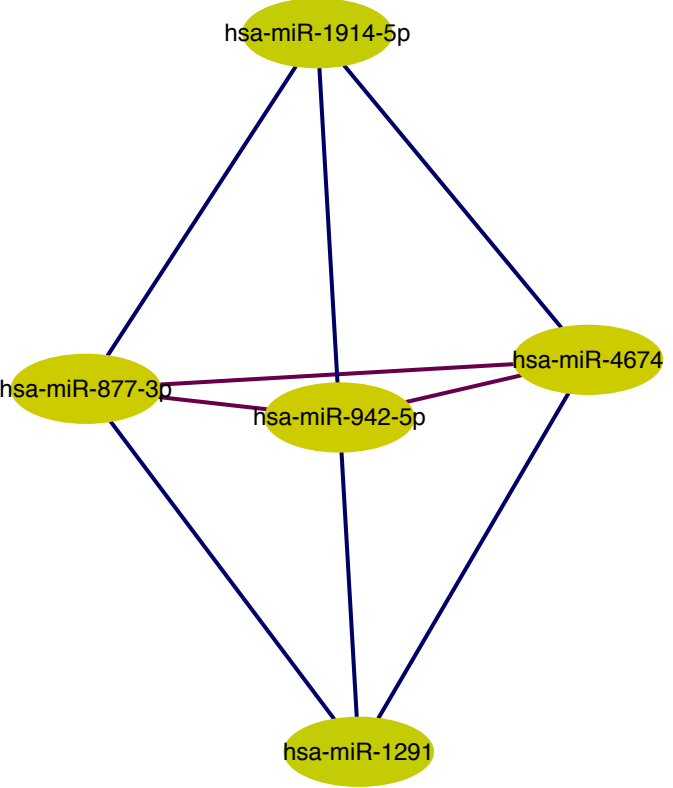

## Module 6

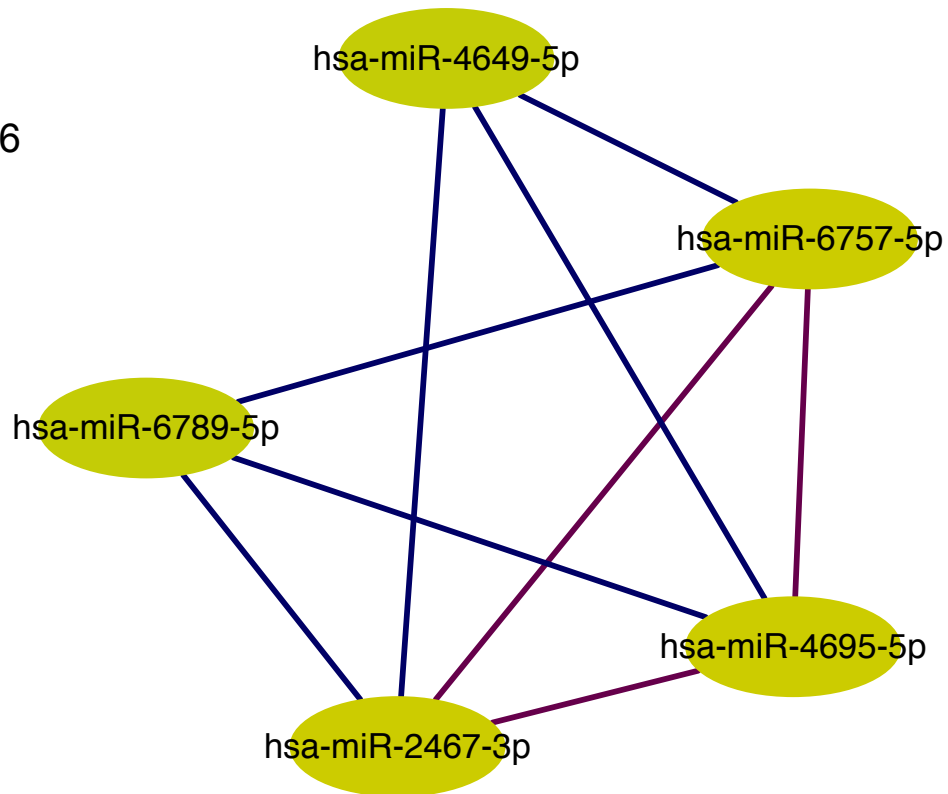

Module 7

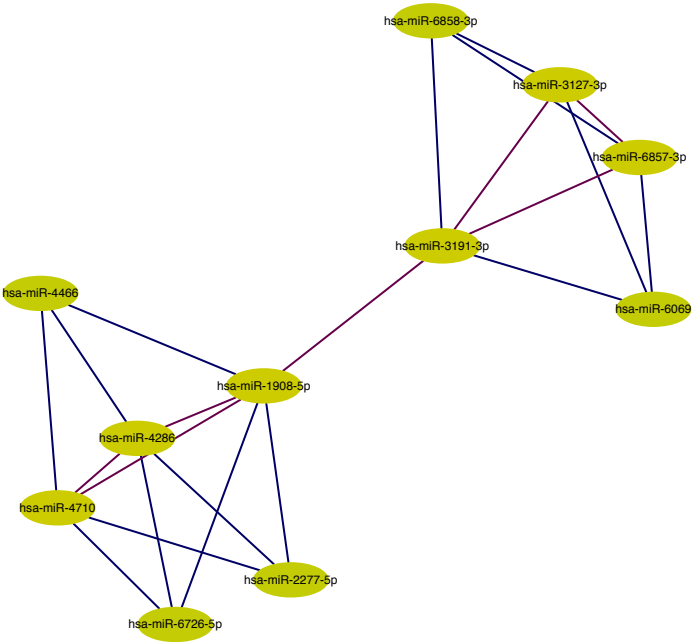



Module 8

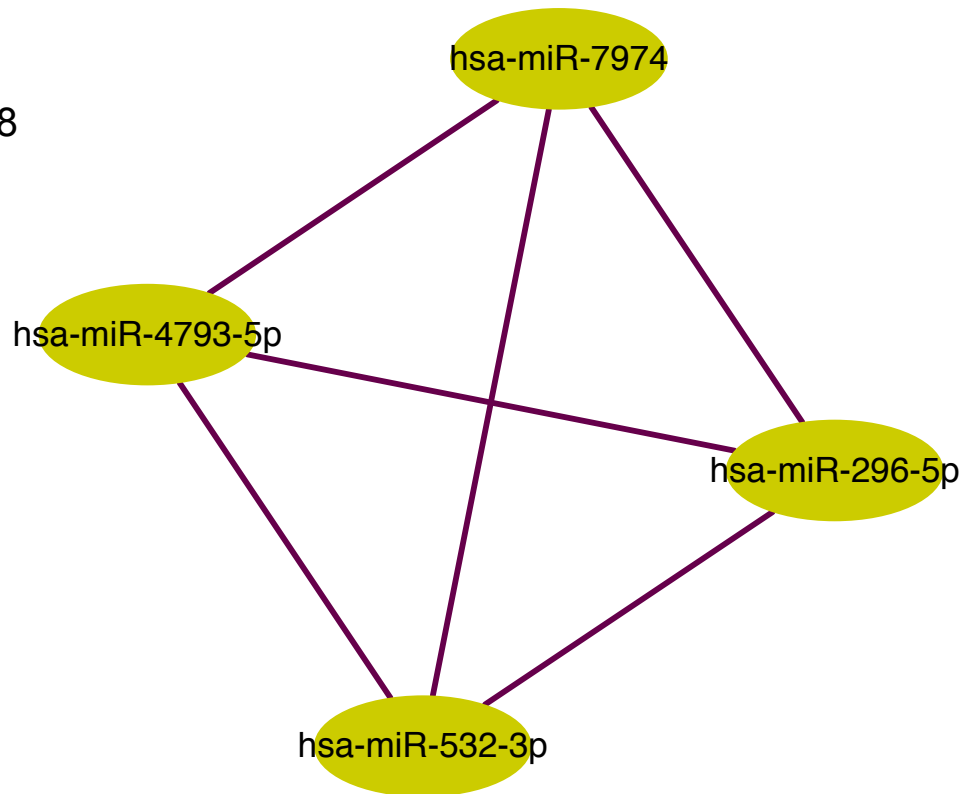

Module 9

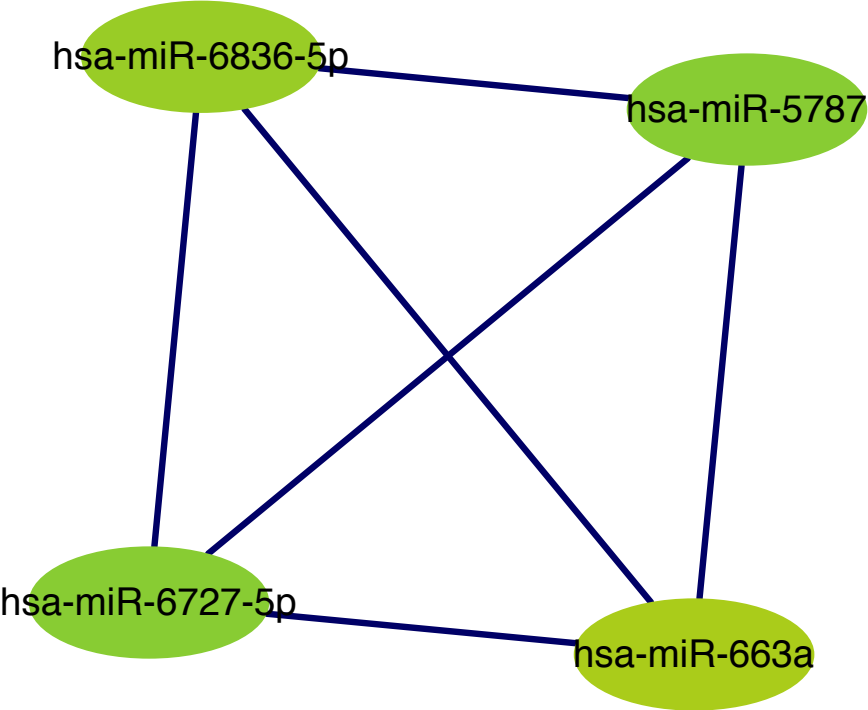

Module 10

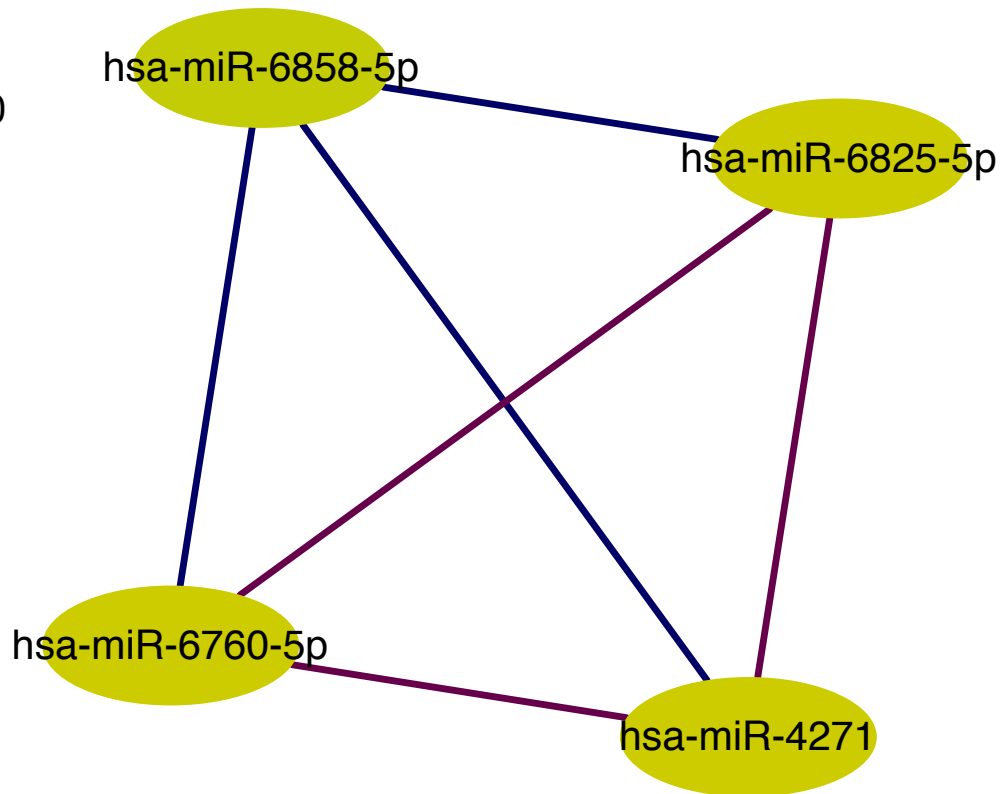

Module 11

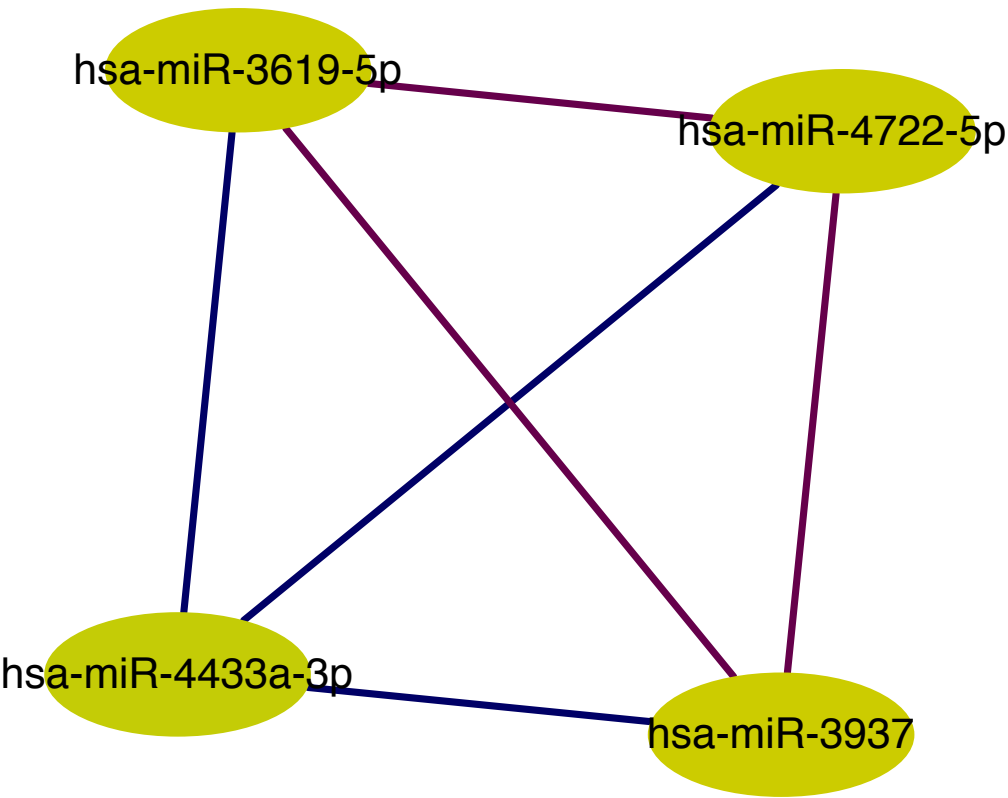

Module 12

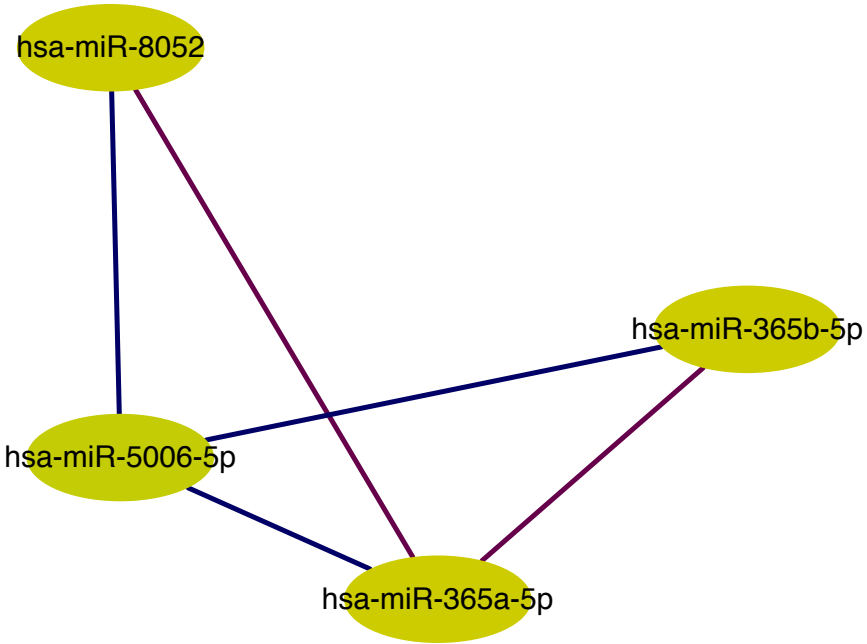

Module 13

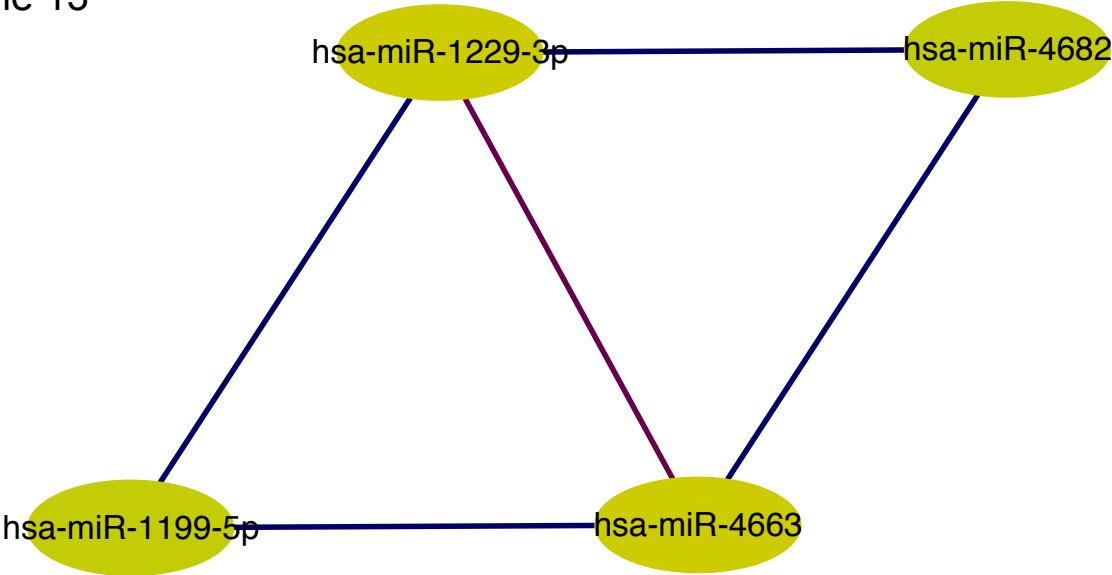

Module 14

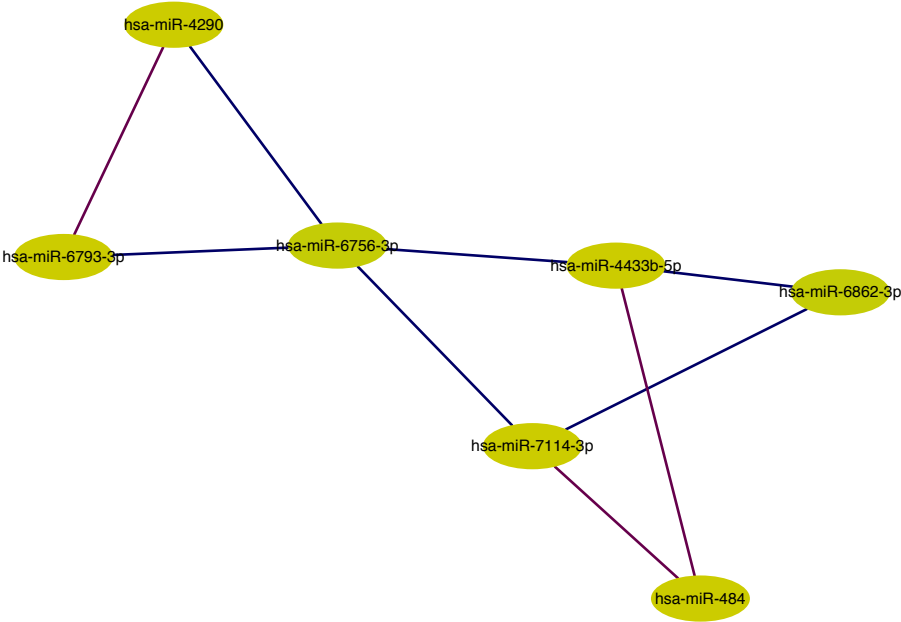

Module 15

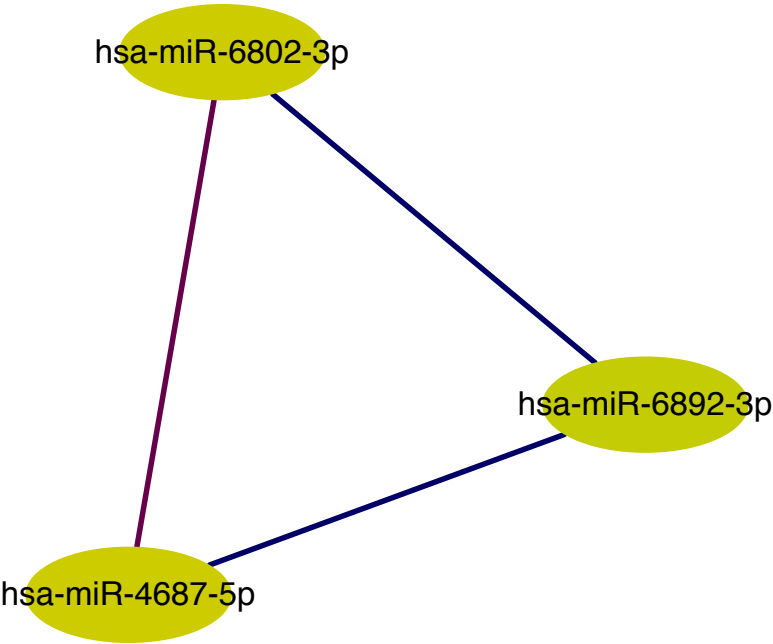



## Module 16

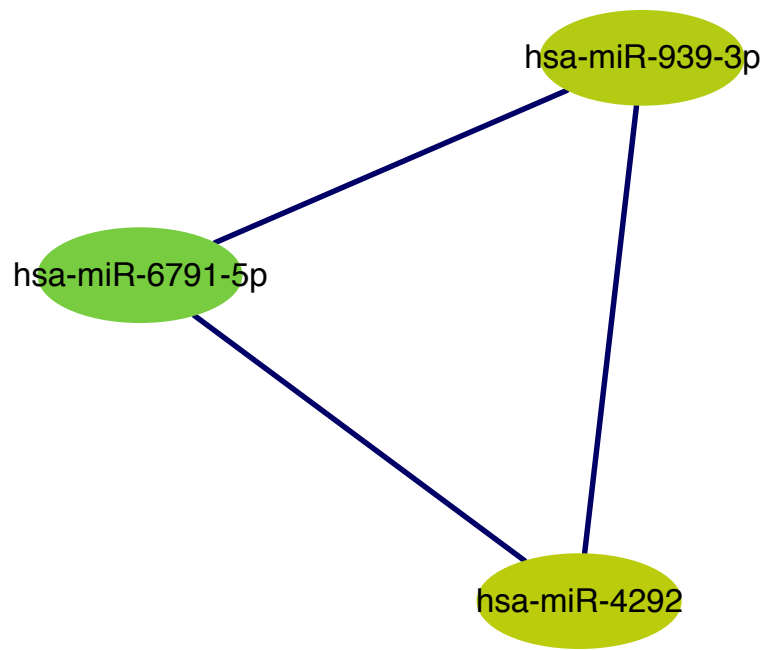

## Module 17

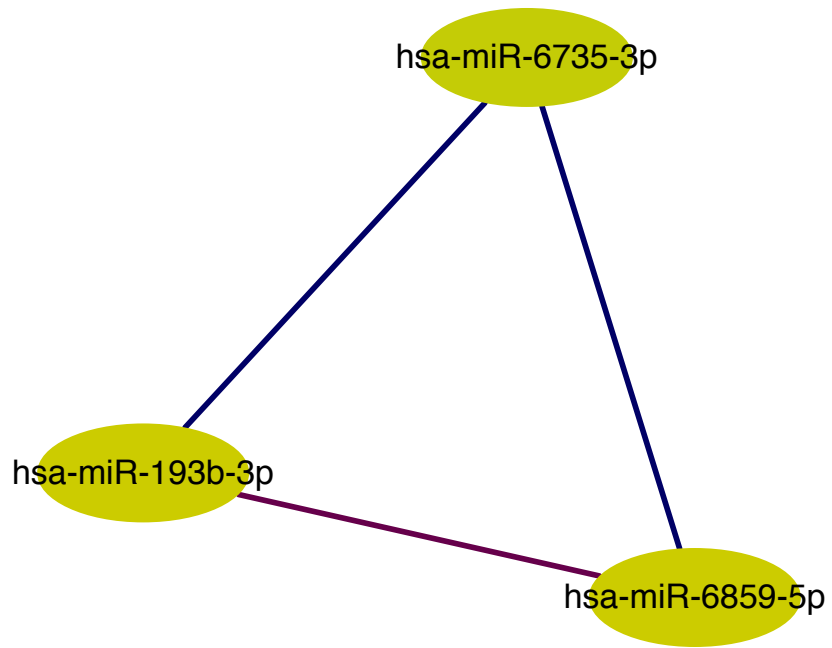

Module 18

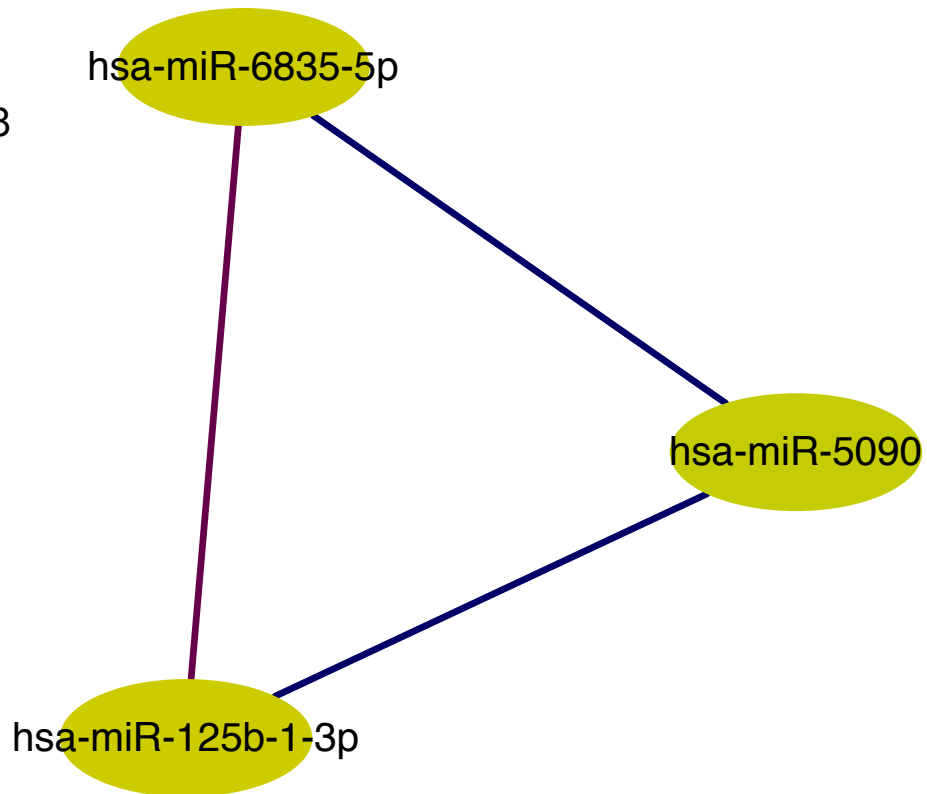

Supplement: s1 [file s1]
