# Supplementary figures and images for: miRNA Mediated Noise Making of 3′UTR Mutations in Cancer
Source: MDPI journal article supplement (doi:10.3390/genes9110545), 2018-11-12

A

Tumor

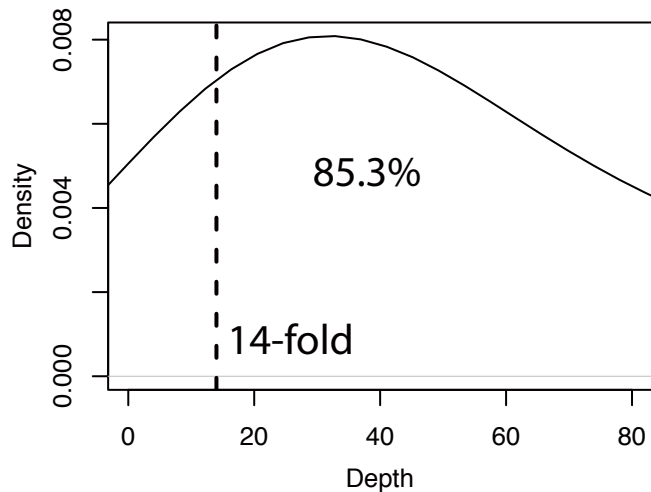

B

Normal

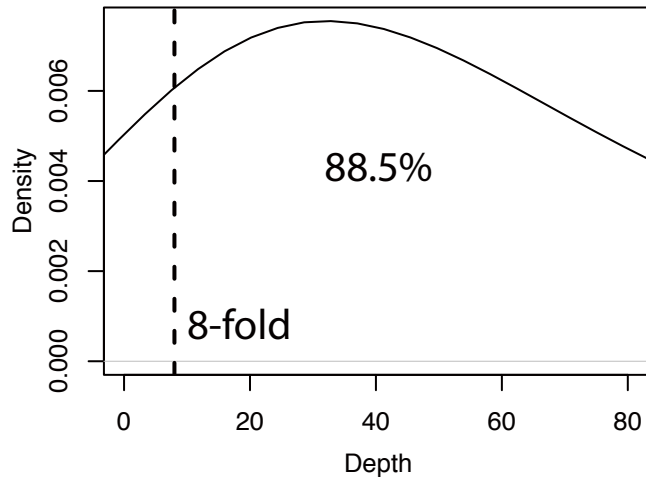

Supplement: s1 [file s1]

## Degree of energy change

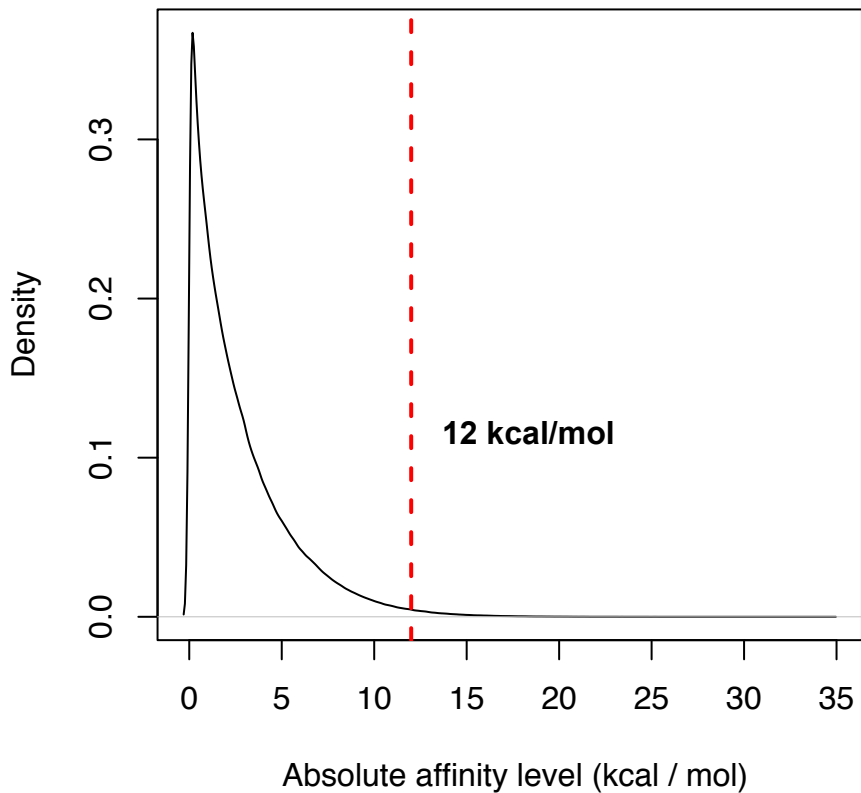

Supplement: s1 [file s1]
